# Supplementary material for: Identification of a circulating MicroRNA signature to distinguish recurrence in breast cancer patients
Source: PubMed Central journal article supplement (PMC5342414; doi:10.18632/oncotarget.10485), 2016-07-08
Supplement: oncotarget-07-55231-s001.pdf [file oncotarget-07-55231-s001.pdf]

SUPPLEMENTARY FIGURE AND TABLES

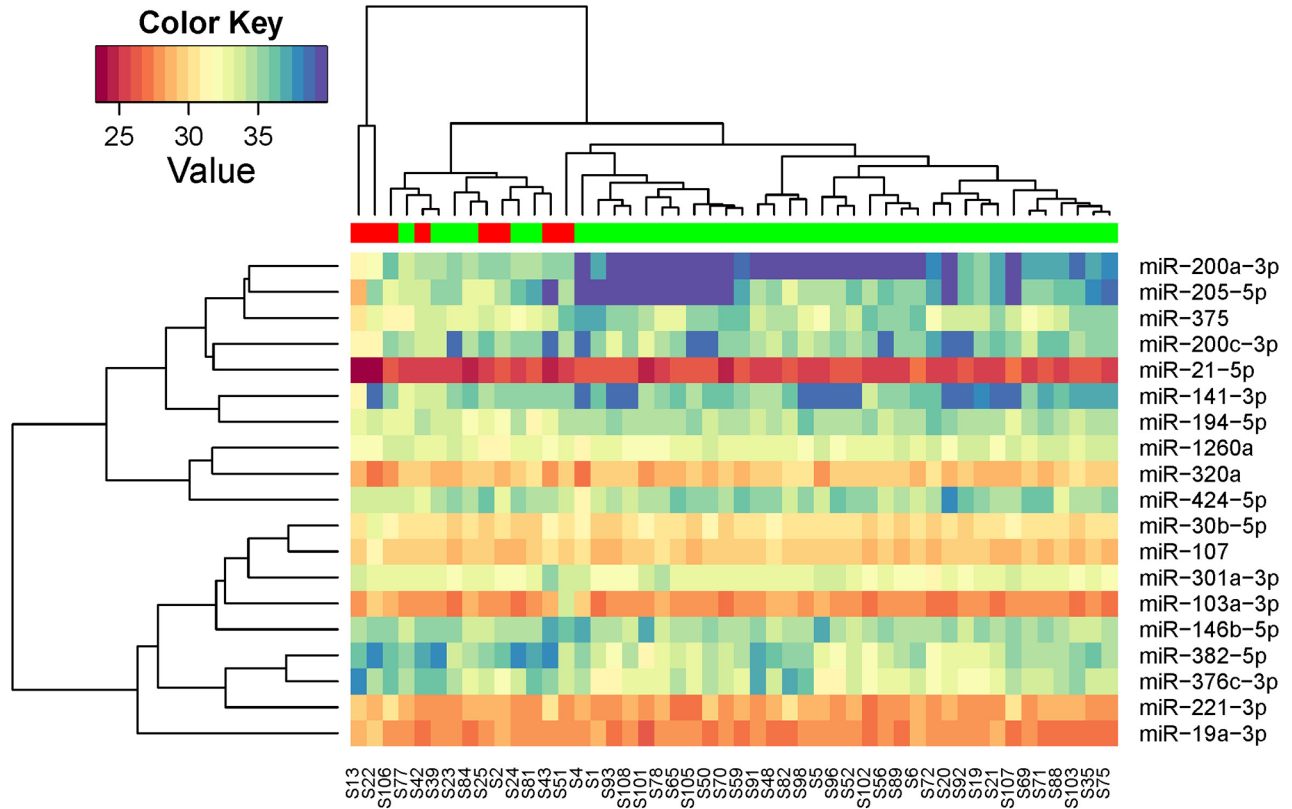

Supplementary Figure 1: Unsupervised hierarchical clustering with Pearson distance metric, based on the 19 miRNAs that were selected for further validation experiment (red: samples at recurrence from patients with recurrence; green: samples at diagnosis from patients without recurrence).

Supplementary Table 1: Normalized expression of 7 miRNAs in sera of recurrent breast cancer patients and non-cancer controls

|             | Non-cancer controls (N=31) |      | Recurrent patients (n=8) |      | Fold Difference | P value |
|-------------|----------------------------|------|--------------------------|------|-----------------|---------|
|             | Mean                       | SD   | Mean                     | SD   |                 |         |
| miR-194-5p  | -3.66                      | 0.83 | -3.10                    | 0.94 | 1.48            | 0.11    |
| miR-205-5p  | -6.81                      | 2.17 | -3.74                    | 3.16 | 8.42            | 0.001   |
| miR-21-5p   | 4.47                       | 0.48 | 5.27                     | 1.11 | 1.75            | 0.001   |
| miR-375     | -3.56                      | 1.48 | -2.75                    | 1.70 | 1.76            | 0.18    |
| miR-376c-3p | -3.20                      | 1.07 | -4.61                    | 1.83 | 0.38            | 0.11    |
| miR-382-5p  | -3.75                      | 1.23 | -5.89                    | 1.44 | 0.23            | 3.0E-04 |
| miR-411-5p  | -7.14                      | 1.98 | -8.47                    | 1.48 | 0.40            | 0.08    |

**Supplementary Table 2: Significantly enriched KEGG pathways for the 32 microRNAs identified in the discovery phase**

| <b>KEGG pathway</b>                         | <b>FDR</b>      | <b># of genes</b> | <b># of miRNAs</b> |
|---------------------------------------------|-----------------|-------------------|--------------------|
| <b>MicroRNAs in cancer</b>                  | <b>4.02E-68</b> | <b>143</b>        | <b>29</b>          |
| Proteoglycans in cancer                     | 1.36E-21        | 162               | 30                 |
| Cell cycle                                  | 9.74E-12        | 105               | 29                 |
| Viral carcinogenesis                        | 1.75E-11        | 156               | 30                 |
| Endocytosis                                 | 5.13E-11        | 161               | 29                 |
| Hepatitis B                                 | 5.13E-11        | 111               | 30                 |
| Pancreatic cancer                           | 6.32E-10        | 61                | 30                 |
| Renal cell carcinoma                        | 1.94E-08        | 59                | 29                 |
| Fatty acid elongation                       | 4.30E-08        | 18                | 18                 |
| Adherens junction                           | 4.30E-08        | 63                | 28                 |
| Spliceosome                                 | 4.65E-08        | 104               | 29                 |
| Chronic myeloid leukemia                    | 1.72E-07        | 64                | 30                 |
| Glioma                                      | 2.48E-07        | 53                | 30                 |
| FoxO signaling pathway                      | 2.72E-07        | 109               | 30                 |
| <b>p53 signaling pathway</b>                | <b>3.63E-07</b> | <b>61</b>         | <b>29</b>          |
| Transcriptional misregulation in cancer     | 3.63E-07        | 128               | 29                 |
| Prostate cancer                             | 4.70E-07        | 77                | 30                 |
| Non-small cell lung cancer                  | 5.22E-07        | 49                | 29                 |
| Protein processing in endoplasmic reticulum | 5.22E-07        | 131               | 30                 |
| Hippo signaling pathway                     | 5.22E-07        | 108               | 30                 |
| Colorectal cancer                           | 6.20E-07        | 54                | 29                 |
| Other types of O-glycan biosynthesis        | 1.11E-06        | 24                | 21                 |
| <b>Pathways in cancer</b>                   | <b>1.11E-06</b> | <b>272</b>        | <b>30</b>          |
| N-Glycan biosynthesis                       | 3.72E-06        | 40                | 25                 |
| Ubiquitin mediated proteolysis              | 5.33E-06        | 105               | 29                 |
| Endometrial cancer                          | 6.36E-06        | 46                | 30                 |
| Bladder cancer                              | 4.47E-05        | 35                | 28                 |
| <b>ErbB signaling pathway</b>               | <b>4.47E-05</b> | <b>67</b>         | <b>30</b>          |
| HTLV-I infection                            | 9.88E-05        | 182               | 29                 |
| Acute myeloid leukemia                      | 0.000105        | 48                | 27                 |
| Bacterial invasion of epithelial cells      | 0.000105        | 60                | 28                 |
| Lysine degradation                          | 0.000106        | 37                | 26                 |
| Neurotrophin signaling pathway              | 0.000106        | 91                | 30                 |
| Fatty acid metabolism                       | 0.00014         | 30                | 23                 |
| Central carbon metabolism in cancer         | 0.000251        | 53                | 29                 |
| Prion diseases                              | 0.000268        | 22                | 25                 |

| KEGG pathway                                             | FDR             | # of genes | # of miRNAs |
|----------------------------------------------------------|-----------------|------------|-------------|
| Thyroid hormone signaling pathway                        | 0.000268        | 86         | 30          |
| Thyroid cancer                                           | 0.000297        | 25         | 24          |
| TGF-beta signaling pathway                               | 0.000304        | 58         | 30          |
| Insulin signaling pathway                                | 0.000616        | 103        | 30          |
| RNA degradation                                          | 0.000708        | 61         | 28          |
| TNF signaling pathway                                    | 0.000708        | 82         | 29          |
| HIF-1 signaling pathway                                  | 0.000812        | 79         | 30          |
| MAPK signaling pathway                                   | 0.000812        | 173        | 29          |
| <b>mTOR signaling pathway</b>                            | <b>0.000812</b> | <b>51</b>  | <b>29</b>   |
| Small cell lung cancer                                   | 0.000878        | 66         | 28          |
| Non-alcoholic fatty liver disease (NAFLD)                | 0.001353        | 108        | 28          |
| Signaling pathways regulating pluripotency of stem cells | 0.001665        | 98         | 30          |
| Oocyte meiosis                                           | 0.001711        | 78         | 27          |
| RNA transport                                            | 0.002663        | 117        | 29          |
| Focal adhesion                                           | 0.002846        | 144        | 30          |
| Sphingolipid signaling pathway                           | 0.002963        | 87         | 30          |
| <b>Estrogen signaling pathway</b>                        | <b>0.003272</b> | <b>69</b>  | <b>29</b>   |
| Apoptosis                                                | 0.003872        | 64         | 30          |
| Regulation of actin cytoskeleton                         | 0.003872        | 140        | 30          |
| Glycosaminoglycan biosynthesis - keratan sulfate         | 0.005643        | 12         | 17          |
| Melanoma                                                 | 0.005643        | 52         | 30          |
| Shigellosis                                              | 0.007605        | 47         | 27          |
| Axon guidance                                            | 0.010275        | 87         | 28          |
| <b>PI3K-Akt signaling pathway</b>                        | <b>0.011426</b> | <b>210</b> | <b>30</b>   |
| Epstein-Barr virus infection                             | 0.013971        | 137        | 29          |
| Huntington's disease                                     | 0.023394        | 122        | 29          |
| Progesterone-mediated oocyte maturation                  | 0.027642        | 63         | 30          |
| Fc gamma R-mediated phagocytosis                         | 0.032015        | 64         | 30          |
| Gap junction                                             | 0.037212        | 58         | 28          |
| VEGF signaling pathway                                   | 0.037838        | 45         | 28          |
| Ribosome                                                 | 0.039186        | 92         | 28          |
| NF-kappa B signaling pathway                             | 0.042572        | 57         | 27          |
| mRNA surveillance pathway                                | 0.042572        | 65         | 29          |
| Choline metabolism in cancer                             | 0.042572        | 72         | 29          |
| Wnt signaling pathway                                    | 0.043012        | 91         | 29          |
| Chagas disease (American trypanosomiasis)                | 0.049234        | 71         | 30          |

KEGG, Kyoto Encyclopedia of Genes and Genomes; FDR, false discovery rate

**Supplementary Table 3: Significantly enriched KEGG pathways for the intersection of targeted genes of at least 8 microRNAs**

| KEGG pathway                      | FDR             | # of genes | # of miRNAs |
|-----------------------------------|-----------------|------------|-------------|
| <b>Pathways in cancer</b>         | <b>7.41E-05</b> | <b>28</b>  | <b>29</b>   |
| Lysine degradation                | 0.000125        | 7          | 24          |
| Colorectal cancer                 | 0.000228        | 9          | 26          |
| p53 signaling pathway             | 0.000228        | 14         | 27          |
| <b>MicroRNAs in cancer</b>        | <b>0.001093</b> | <b>30</b>  | <b>29</b>   |
| Hepatitis B                       | 0.002413        | 16         | 28          |
| Glioma                            | 0.014811        | 9          | 28          |
| Thyroid hormone signaling pathway | 0.014811        | 14         | 29          |
| Proteoglycans in cancer           | 0.014811        | 18         | 29          |
| Chronic myeloid leukemia          | 0.016312        | 10         | 26          |
| Hippo signaling pathway           | 0.016312        | 17         | 27          |
| PI3K-Akt signaling pathway        | 0.016312        | 27         | 29          |
| Epstein-Barr virus infection      | 0.024709        | 22         | 29          |
| Bladder cancer                    | 0.026803        | 8          | 26          |
| Focal adhesion                    | 0.03458         | 20         | 29          |
| Prostate cancer                   | 0.034792        | 12         | 29          |
| FoxO signaling pathway            | 0.034865        | 14         | 29          |
| Cell cycle                        | 0.037645        | 16         | 28          |

The 28 genes in the cancer pathways jointly targeted by at least 8 miRNAs:

*ABLI, BCL2, CASP3, CCND1, CDK6, CDKN1A, CRKL, E2F1, E2F3, MDM2, MYC, PTEN, VEGFA, CTNNB1, FGF2, FNI, GSK3B, HIF1A, HSP90AA1, HSP90AB1, IGF1R, ITGA6, JUN, LAMC1, MAPK8, NCOA4, STK4, TGFBR2*

The 30 genes in microRNAs in cancer pathway jointly targeted by at least 8 miRNAs

*ABLI, BCL2, CASP3, CCND1, CDK6, CDKN1A, CRKL, E2F1, E2F3, MDM2, MYC, PTEN, VEGFA, BCL2L11, BMPR2, CCND2, CCNG1, CDC25A, DDIT4, DICER1, FOXP1, GLS, HMGA2, IGF2BP1, MARCKS, MCL1, NOTCH2, SOX4, THBS1, TRIM71*

KEGG, Kyoto Encyclopedia of Genes and Genomes; FDR, false discovery rate
